# Supplementary material for: Identification of the Gossypium hirsutum SDG Gene Family and Functional Study of GhSDG59 in Response to Drought Stress
Source: MDPI journal article supplement (doi:10.3390/plants13091257), 2024-04-30
Supplement: s1 [file s1]

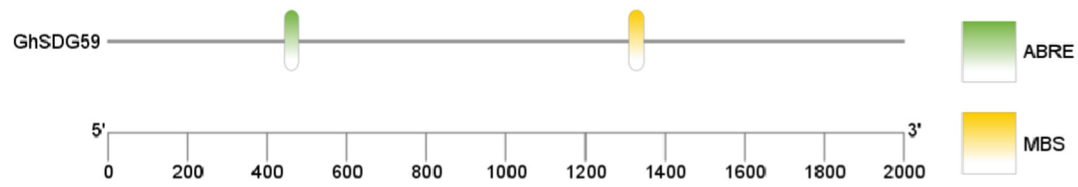

**Figure S1.** Analysis of *cis*-acting elements on *GhSDG59* gene promoter

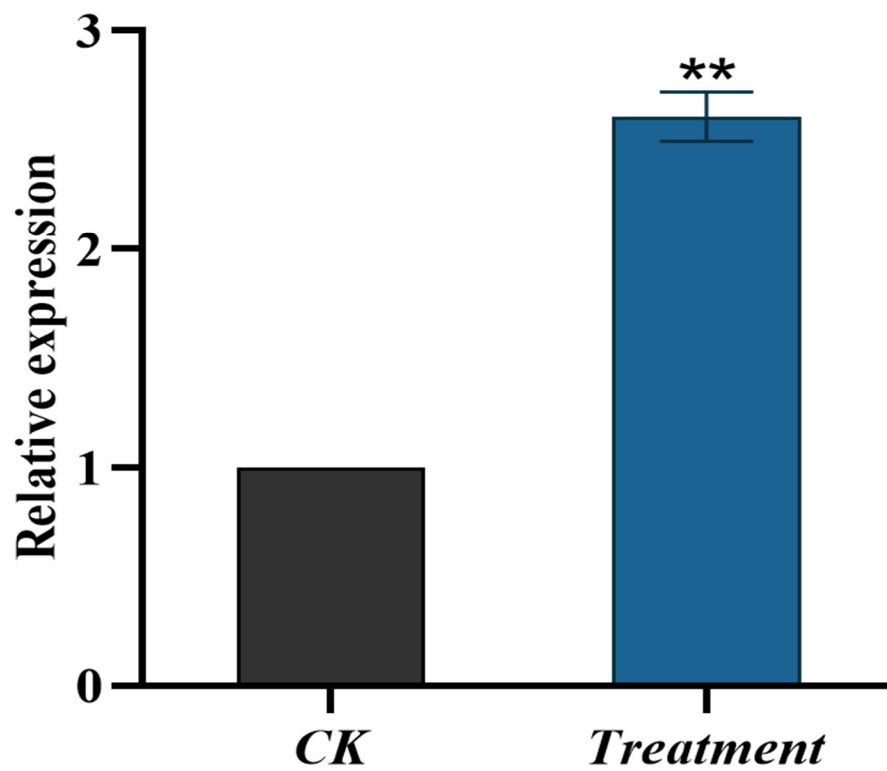

**Figure S2.** Expression analysis of the *GhSDG59* gene under normal watering and drought stress. The *GhHis3* as an internal reference gene for qPCR experiment. The error bar represents the standard deviation of three independent biological replicates. The asterisks indicate significant differences according to student's t-test. \*,  $p < 0.05$ ; \*\*,  $p < 0.01$

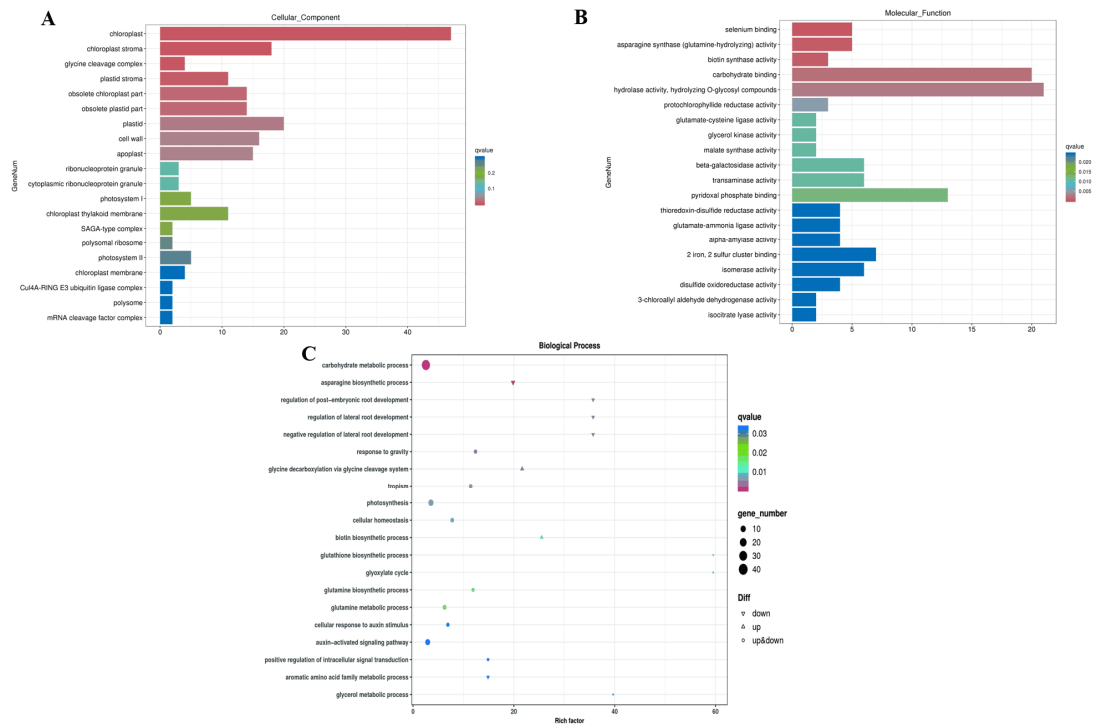

**Figure S3.** Gene Ontology annotation analysis of DEGs. **(A)** DEGs are annotated to cellular components. The histogram shows the number of genes for each category. **(B)** DEGs are annotated to molecular functions. The histogram shows the number of genes for each category. **(C)** DEGs are annotated to biological processes. The histogram shows the number of genes for each category.
