# Supplementary material for: Identification of the Gossypium hirsutum SDG Gene Family and Functional Study of GhSDG59 in Response to Drought Stress
Source: MDPI journal article supplement (doi:10.3390/plants13091257), 2024-04-30
Supplement: s1 [file s1]

**Table S1.** Characteristics of SDG family genes in *Gossypium hirsutum*

| Gene name | Sequence ID     | Number of Amino Acid | Molecular Weight | Theoretical pI | Instability Index | Hydrophilicity coefficient | Subcellular localization |
|-----------|-----------------|----------------------|------------------|----------------|-------------------|----------------------------|--------------------------|
| GhSDG1    | Ghir_A01G001580 | 327                  | 37112.26         | 4.69           | 57.73             | -0.225                     | Cytoplasm                |
| GhSDG2    | Ghir_A02G007430 | 2299                 | 249781.71        | 5.49           | 43.8              | -0.698                     | Nucleus                  |
| GhSDG3    | Ghir_A02G007840 | 479                  | 54508.24         | 8.14           | 43.67             | -0.184                     | Cytoplasm                |
| GhSDG4    | Ghir_A02G009870 | 1245                 | 138061.71        | 8.51           | 43.71             | -0.488                     | Nucleus                  |
| GhSDG5    | Ghir_A02G017730 | 1502                 | 169863           | 6.17           | 44                | -0.507                     | Nucleus                  |
| GhSDG6    | Ghir_A02G017740 | 1503                 | 169871.58        | 5.85           | 46.3              | -0.517                     | Nucleus                  |
| GhSDG7    | Ghir_A03G006100 | 427                  | 49065.01         | 9.37           | 53.78             | -0.441                     | Mitochondria             |
| GhSDG8    | Ghir_A03G016960 | 866                  | 97874.12         | 9.21           | 39.71             | -0.833                     | Nucleus                  |
| GhSDG9    | Ghir_A03G018020 | 2427                 | 276053.45        | 6.11           | 50.65             | -0.79                      | Nucleus                  |
| GhSDG10   | Ghir_A05G024300 | 1732                 | 190774.11        | 6.64           | 49.61             | -0.594                     | Nucleus                  |
| GhSDG11   | Ghir_A05G029100 | 657                  | 72891.73         | 8.57           | 44.66             | -0.498                     | Nucleus                  |
| GhSDG12   | Ghir_A05G034670 | 701                  | 78218.91         | 9.09           | 40.44             | -0.407                     | Chloroplast              |
| GhSDG13   | Ghir_A05G041020 | 664                  | 73333.98         | 7.08           | 35.86             | -0.43                      | Nucleus                  |
| GhSDG14   | Ghir_A05G042680 | 1093                 | 123910.38        | 8.59           | 48.42             | -0.543                     | Nucleus                  |
| GhSDG15   | Ghir_A06G011840 | 625                  | 69646.04         | 6.16           | 51.36             | -0.132                     | Nucleus                  |
| GhSDG16   | Ghir_A06G012070 | 492                  | 55990.92         | 5.63           | 42.29             | -0.689                     | Nucleus                  |
| GhSDG17   | Ghir_A07G003450 | 1560                 | 171890.48        | 8.63           | 48.65             | -0.511                     | Nucleus                  |
| GhSDG18   | Ghir_A07G017550 | 357                  | 41011.27         | 8.84           | 50.52             | -0.22                      | Extracel                 |
| GhSDG19   | Ghir_A08G005450 | 239                  | 27193.25         | 8.15           | 47.17             | -0.397                     | Nucleus                  |
| GhSDG20   | Ghir_A08G009060 | 561                  | 64097.16         | 4.95           | 40                | -0.218                     | Nucleus                  |
| GhSDG21   | Ghir_A08G017250 | 1038                 | 115708.41        | 5.45           | 50.73             | -0.725                     | Nucleus                  |
| GhSDG22   | Ghir_A08G020070 | 726                  | 80642.21         | 5.52           | 50.1              | -0.539                     | Mitochondria             |

|         |                 |      |           |      |       |        |              |
|---------|-----------------|------|-----------|------|-------|--------|--------------|
| GhSDG23 | Ghir_A09G013870 | 337  | 37014.59  | 6.65 | 60.84 | 0.026  | Chloroplast  |
| GhSDG24 | Ghir_A09G024510 | 693  | 77642.06  | 5.41 | 48.6  | -0.323 | Nucleus      |
| GhSDG25 | Ghir_A09G024920 | 390  | 43134.72  | 4.47 | 55.38 | -0.117 | Chloroplast  |
| GhSDG26 | Ghir_A10G013820 | 1042 | 117726.77 | 7.27 | 39.41 | -0.468 | Nucleus      |
| GhSDG27 | Ghir_A11G014170 | 829  | 92676.32  | 5.96 | 57.1  | -0.511 | Nucleus      |
| GhSDG28 | Ghir_A11G020600 | 940  | 104825.16 | 8.73 | 50.74 | -0.698 | Nucleus      |
| GhSDG29 | Ghir_A11G024460 | 371  | 42436.92  | 9.31 | 57.26 | -0.619 | Mitochondria |
| GhSDG30 | Ghir_A11G025060 | 360  | 39894.34  | 5.56 | 54.71 | -0.217 | Nucleus      |
| GhSDG31 | Ghir_A11G033330 | 697  | 76963.84  | 6.88 | 46.45 | -0.459 | Nucleus      |
| GhSDG32 | Ghir_A12G005330 | 445  | 49931.1   | 5.59 | 32.51 | -0.25  | Nucleus      |
| GhSDG33 | Ghir_A12G012070 | 1019 | 116396.3  | 7.83 | 47.08 | -0.584 | Chloroplast  |
| GhSDG34 | Ghir_A12G013390 | 748  | 83780.3   | 6.31 | 51.01 | -0.847 | Nucleus      |
| GhSDG35 | Ghir_A12G016310 | 475  | 52536.95  | 6.04 | 34.32 | -0.008 | Chloroplast  |
| GhSDG36 | Ghir_A12G022660 | 919  | 103086.92 | 8.36 | 51.17 | -0.597 | Nucleus      |
| GhSDG37 | Ghir_A12G026340 | 1091 | 124448.12 | 8.79 | 46.89 | -0.59  | Nucleus      |
| GhSDG38 | Ghir_A13G000150 | 667  | 74096.13  | 8.4  | 40.12 | -0.485 | Nucleus      |
| GhSDG39 | Ghir_A13G010790 | 457  | 51796.77  | 6.48 | 44.04 | -0.59  | Cytoplasm    |
| GhSDG40 | Ghir_A13G021830 | 398  | 45749.26  | 8.66 | 51.58 | -0.356 | Cytoplasm    |
| GhSDG41 | Ghir_D01G001580 | 483  | 54356.85  | 4.92 | 52.52 | -0.284 | Nucleus      |
| GhSDG42 | Ghir_D02G007880 | 2316 | 251988.18 | 5.31 | 44.54 | -0.7   | Nucleus      |
| GhSDG43 | Ghir_D02G008260 | 482  | 54808.69  | 7.4  | 44.46 | -0.14  | Cytoplasm    |
| GhSDG44 | Ghir_D02G010380 | 1256 | 139068.43 | 8.4  | 45.44 | -0.525 | Nucleus      |
| GhSDG45 | Ghir_D02G018230 | 969  | 109444.2  | 9.52 | 39.4  | -0.841 | Nucleus      |
| GhSDG46 | Ghir_D02G019330 | 2055 | 234437.15 | 6.66 | 53.65 | -0.818 | Nucleus      |

|         |                 |      |           |      |       |        |              |
|---------|-----------------|------|-----------|------|-------|--------|--------------|
| GhSDG47 | Ghir_D03G001810 | 1538 | 173683.23 | 6.01 | 44.9  | -0.495 | Nucleus      |
| GhSDG48 | Ghir_D03G001820 | 1534 | 173641.2  | 6.1  | 44.99 | -0.511 | Nucleus      |
| GhSDG49 | Ghir_D03G011650 | 879  | 98941.54  | 5.23 | 46.53 | -0.453 | Nucleus      |
| GhSDG50 | Ghir_D03G012790 | 327  | 36920.68  | 9.13 | 56.71 | -0.494 | Mitochondria |
| GhSDG51 | Ghir_D04G000200 | 1059 | 119992.82 | 8.6  | 50.77 | -0.572 | Nucleus      |
| GhSDG52 | Ghir_D04G001950 | 664  | 73041.78  | 7.07 | 34.87 | -0.399 | Nucleus      |
| GhSDG53 | Ghir_D04G006380 | 443  | 49944.88  | 9.31 | 53.52 | -0.223 | Chloroplast  |
| GhSDG54 | Ghir_D04G007810 | 701  | 77965.44  | 8.98 | 40.65 | -0.431 | Chloroplast  |
| GhSDG55 | Ghir_D05G024150 | 1970 | 217207.93 | 7.94 | 50.17 | -0.634 | Nucleus      |
| GhSDG56 | Ghir_D05G029170 | 657  | 72758.62  | 8.64 | 45.06 | -0.5   | Nucleus      |
| GhSDG57 | Ghir_D06G012440 | 492  | 56052     | 5.58 | 42.93 | -0.7   | Nucleus      |
| GhSDG58 | Ghir_D06G012650 | 420  | 46119.41  | 5.73 | 57.55 | -0.106 | Nucleus      |
| GhSDG59 | Ghir_D06G020680 | 429  | 48337.95  | 8.46 | 44.18 | -0.221 | Cytoplasm    |
| GhSDG60 | Ghir_D07G003460 | 2063 | 226969.43 | 8.48 | 48.29 | -0.461 | Nucleus      |
| GhSDG61 | Ghir_D08G005570 | 202  | 22773.99  | 5.33 | 42.43 | -0.339 | Nucleus      |
| GhSDG62 | Ghir_D08G018070 | 808  | 90503.49  | 7.23 | 48.95 | -0.61  | Nucleus      |
| GhSDG63 | Ghir_D08G020910 | 726  | 80803.42  | 5.53 | 51.01 | -0.549 | Nucleus      |
| GhSDG59 | Ghir_D09G013370 | 337  | 37108.6   | 6.18 | 59.59 | 0.018  | Cytoplasm    |
| GhSDG65 | Ghir_D09G023660 | 634  | 71116.54  | 5.65 | 49.73 | -0.369 | Nucleus      |
| GhSDG66 | Ghir_D09G024110 | 390  | 42978.48  | 4.55 | 55.78 | -0.139 | Chloroplast  |
| GhSDG67 | Ghir_D10G013790 | 1063 | 120076.5  | 8.2  | 39.74 | -0.483 | Nucleus      |
| GhSDG68 | Ghir_D11G014210 | 757  | 84236.75  | 6.08 | 57.89 | -0.531 | Nucleus      |
| GhSDG69 | Ghir_D11G020640 | 921  | 102800.8  | 8.74 | 51.82 | -0.733 | Nucleus      |
| GhSDG70 | Ghir_D11G024200 | 333  | 38139.86  | 8.67 | 46.1  | -0.545 | Cytoplasm    |

|         |                 |      |           |      |       |        |                 |
|---------|-----------------|------|-----------|------|-------|--------|-----------------|
| GhSDG71 | Ghir_D11G025210 | 362  | 39902.21  | 5.94 | 53.13 | -0.259 | Nucleus         |
| GhSDG72 | Ghir_D11G026160 | 150  | 16730.86  | 8.97 | 34.39 | -0.431 | Cytoplasm       |
| GhSDG73 | Ghir_D11G036710 | 697  | 76636.5   | 6.39 | 45.93 | -0.434 | Nucleus         |
| GhSDG74 | Ghir_D12G005300 | 363  | 41863.09  | 5.66 | 39.15 | -0.058 | Chloroplast     |
| GhSDG75 | Ghir_D12G012280 | 1019 | 116300.14 | 7.92 | 46.19 | -0.593 | Chloroplast     |
| GhSDG76 | Ghir_D12G013620 | 882  | 98522.42  | 7.17 | 46.34 | -0.754 | Nucleus         |
| GhSDG77 | Ghir_D12G016540 | 362  | 40389.91  | 6.26 | 35.72 | -0.036 | Golgi apparatus |
| GhSDG78 | Ghir_D12G022640 | 919  | 103145.8  | 8.16 | 52.67 | -0.614 | Nucleus         |
| GhSDG79 | Ghir_D12G026360 | 1091 | 124625.38 | 8.75 | 45.92 | -0.581 | Nucleus         |
| GhSDG80 | Ghir_D13G000350 | 667  | 74160.13  | 8.48 | 42.12 | -0.511 | Nucleus         |
| GhSDG81 | Ghir_D13G011430 | 432  | 48882.68  | 7.66 | 42.6  | -0.548 | Mitochondria    |
| GhSDG82 | Ghir_D13G022570 | 489  | 55759.89  | 8.93 | 49.78 | -0.38  | Nucleus         |

**Table S2.** Function annotation of *cis*-acting elements

| Cis-acting element name | Function annotation                                             |
|-------------------------|-----------------------------------------------------------------|
| ABRE                    | cis-acting element involved in the abscisic acid responsiveness |
| MBS                     | MYB binding site involved in drought-inducibility               |

**Table S3.** The primers used in this study

| Primer                 | Sequence (5'-3')       |
|------------------------|------------------------|
| <i>GhSDG59</i> -VIGS-F | CATCATCACCTGGTTCTTC    |
| <i>GhSDG59</i> -VIGS-R | CACATAAGTAGAAATTGGT    |
| <i>GhSDG59</i> -qPCR-F | GTTACGACAGTCGGGTACGGTG |
| <i>GhSDG59</i> -qPCR-R | GCAACGGTCGATACAAGCAACC |
| <i>GhHIS3</i> -qPCR-F  | GCGCAAAGGTTGGTGTCTTC   |
| <i>GhHIS3</i> -qPCR-R  | TCAAGACTGATTTGCGTTTCCA |
